# Supplementary material for: Microwave-assisted solution polycondensation of l-lactic acid using a Dean–Stark apparatus for a non-thermal microwave polymerization effect induced by the electric field
Source: Royal Society of Chemistry journal article supplement (doi:10.1039/c4py00639a), 2014-01-01
Supplement: c4py00639a1.pdf [file c4py00639a1.pdf]

## Supporting Information

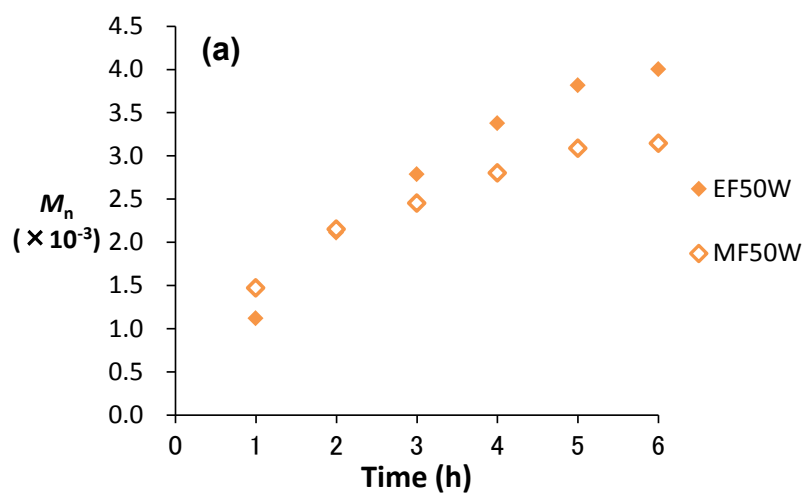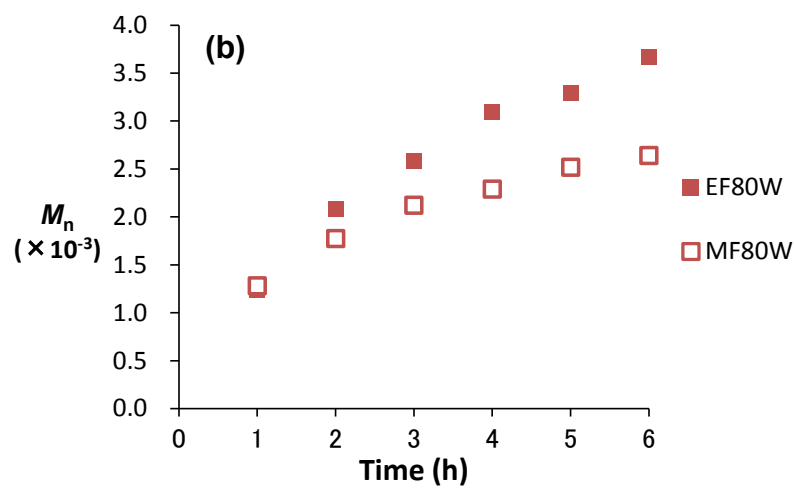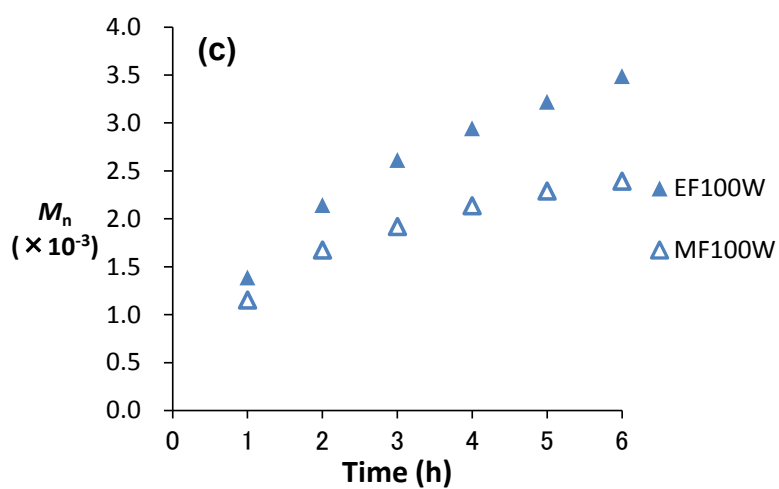

**Figure S1.**  $M_n$  profiles for solution polycondensation of L-LA catalyzed by  $\text{Sc}(\text{OTf})_3$  under EF (filled symbol) or MF (open symbol) at 50 W (a), 80 W (b), and 100 W(c).

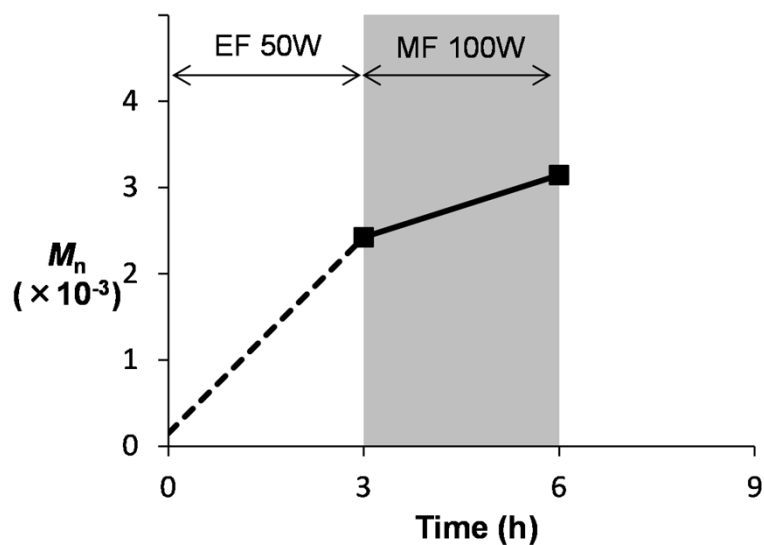

**Figure S2.** Solution polycondensation of L-LA catalyzed by  $\text{Sc}(\text{OTf})_3$  under alternating irradiation of EF (50 W) and MF (100 W).
